# Supplementary material for: Etched stainless steel wire modified with conjugated microporous polymers-F6 for jacket-free stir bar sorptive extraction of benzoylureas in juice sample
Source: Royal Society of Chemistry journal article supplement (doi:10.1039/d4an00551a), 2024-01-01
Supplement: d4an00551a1.pdf [file d4an00551a1.pdf]

## Supplementary Information

### Etched stainless steel wire modified with conjugated microporous polymers-F6 for jacket-free stir bar sorptive extraction of benzoylureas in juice sample

Zichun Liu<sup>†1,2</sup>, Zhuang Hu <sup>†1</sup>, Wei Hu<sup>1</sup>, Tao Ji<sup>1</sup>, Zilin Chen<sup>\*,1,2</sup>

1. Department of Radiation and Medical Oncology , Zhongnan Hospital of Wuhan University, School of Pharmaceutical Sciences, Wuhan University, Wuhan 430072, China
2. Key Laboratory of Combinatorial Biosynthesis and Drug Discovery, Ministry of Education, Hubei Province Engineering and Technology Research Center for Fluorinated Pharmaceuticals, Wuhan, 430071, China

<sup>†</sup>These authors have contributed equally to this work.

#### Corresponding author

Dr. Zilin Chen

Luojia Professor

School of Pharmaceutical Sciences

Wuhan University

Wuhan, 430071

CHINA

Phone: 86-27-68759893

Fax: 86-27-68759850

Email: [chenzl@whu.edu.cn](mailto:chenzl@whu.edu.cn)

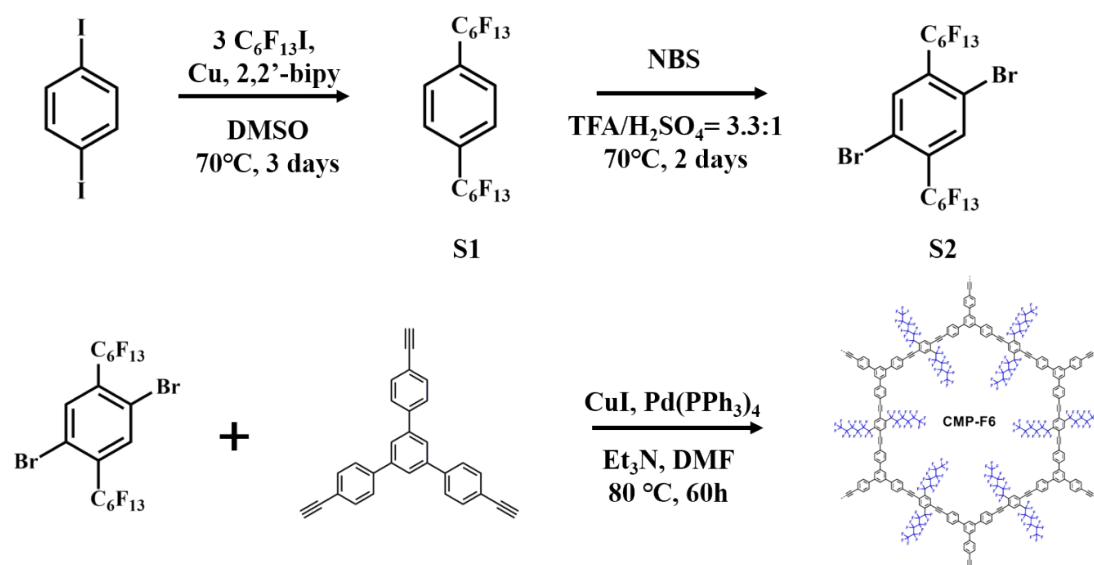

**Fig. S1.** The synthetic route of CMP-F6.

**1,4-bis(perfluorohexyl)benzene (S1).** A 100 ml round-bottom flask equipped with a stir bar was flame-dried and then charged with 1,4-diiodobenzene (3.30 g, 10 mmol), Cu powder (5.08 g, 80 mmol), and 2,2'-bipy (156 mg, 1 mmol). The flask was evacuated and backfilled with argon three times. Anhydrous DMSO (30 mL) was added via a syringe. Perfluorohexyl iodide (6.5 mL, 30 mmol) was added dropwise while stirring. Upon completion of addition, the reaction mixture was heated to  $70^\circ C$  for 72 hours then removed from heat. At the end of the reaction, 100 mL of ethyl acetate and 100 mL of primary water were used to extract the mixture after the reaction. After the solution was stratified, it was observed that the upper organic phase was blue and the lower aqueous phase had a large amount of insoluble matter. The organic layer was further dried with anhydrous  $MgSO_4$ , followed by evaporation of the ethyl acetate from the organic phase by a rotary evaporator to give **S1** as white solids.

**1,4-dibromo-2,5-bis(perfluorohexyl) benzene (S2).** A 50 mL round-bottom flask was charged with **S1** (2.00 g, 2.80 mmol), trifluoroacetic acid (20.0 mL), and concentrated  $H_2SO_4$  (6.0 mL). The reaction mixture was heated to  $60^\circ C$ , and N-bromosuccinimide (1.50 g, 8.43 mmol) was added in portions (250 mg/hr) over 6 hours. The stirring was continued for 48 hours at  $60^\circ C$ . After reaction, the reaction mixture was poured into ice water and extracted three times with ethyl acetate. The organic layer was further dried with anhydrous magnesium sulfate, and the ethyl acetate from the organic phase was then steamed through a rotary evaporator to obtain **S2** as yellow solids.

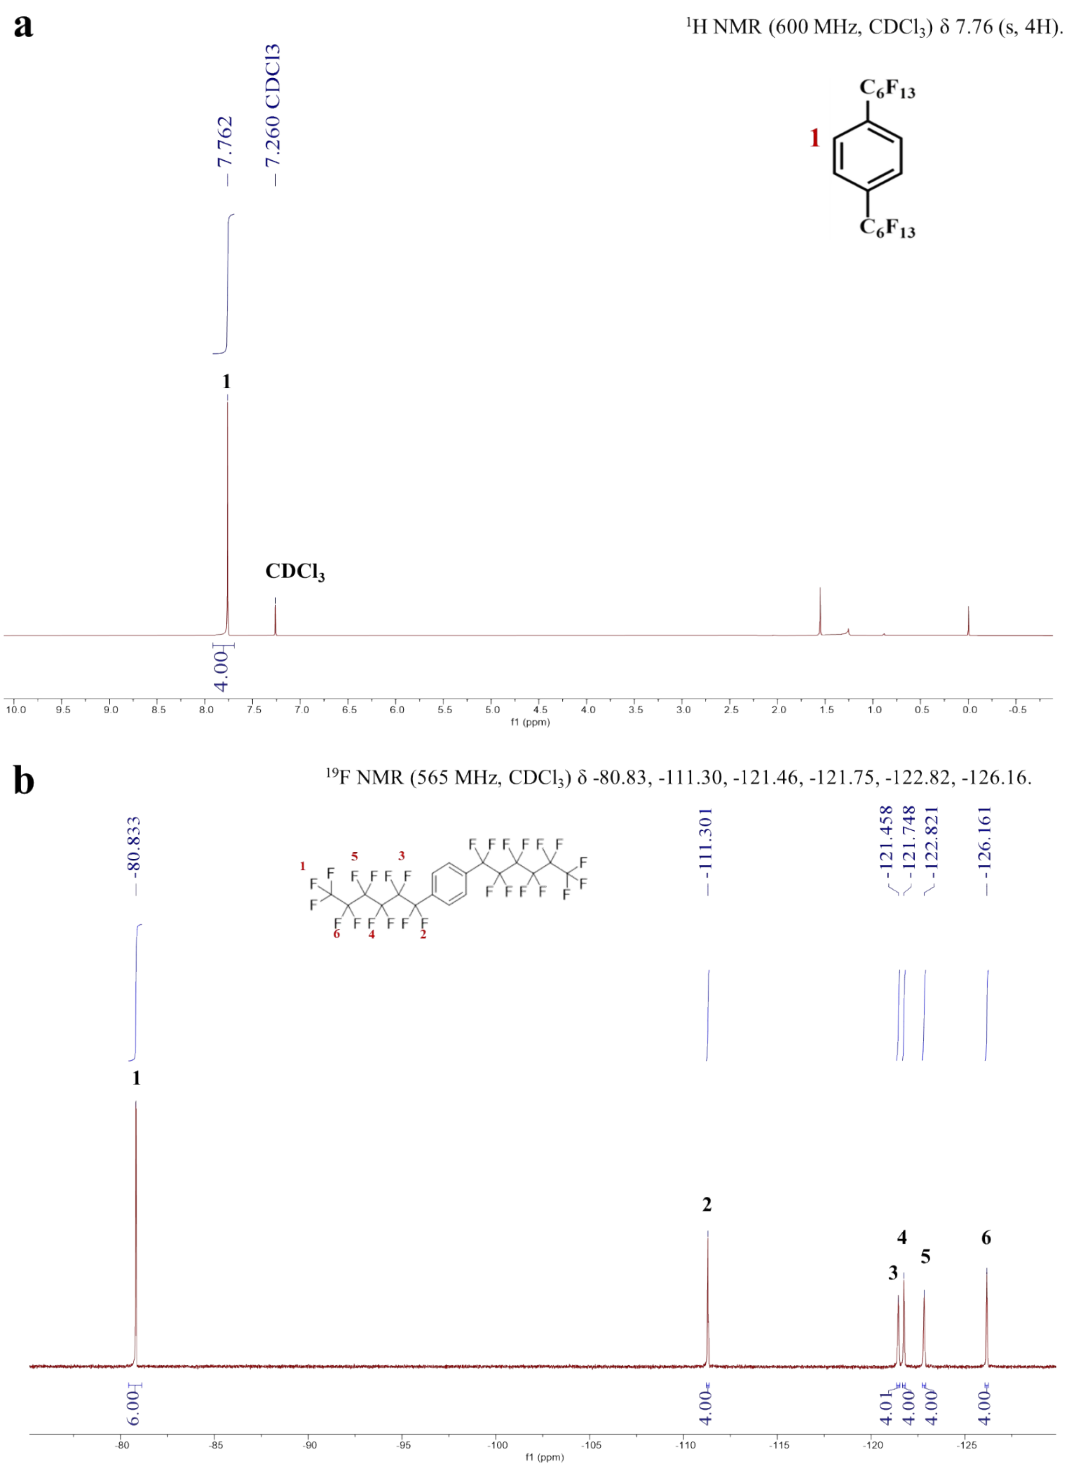

**Fig. S2.** The (a)  $^1\text{H-NMR}$  and (b)  $^{19}\text{F-NMR}$  of **S1**

(a)  $^1\text{H-NMR}$  (600 MHz,  $\text{CDCl}_3$ ):  $\delta$  = 7.76 (s, 4H); (b)  $^{19}\text{F-NMR}$  (565 MHz,  $\text{CDCl}_3$ ):  $\delta$  = -80.833, -111.301, -121.458, -121.748, -122.821, -126.161.

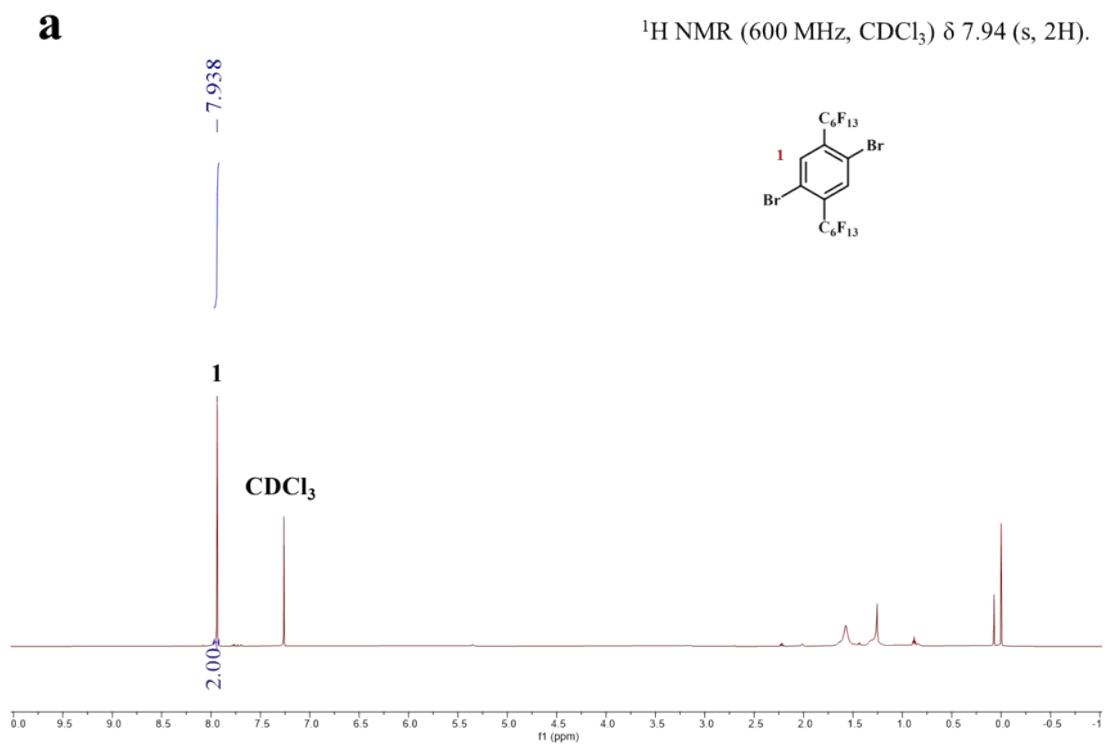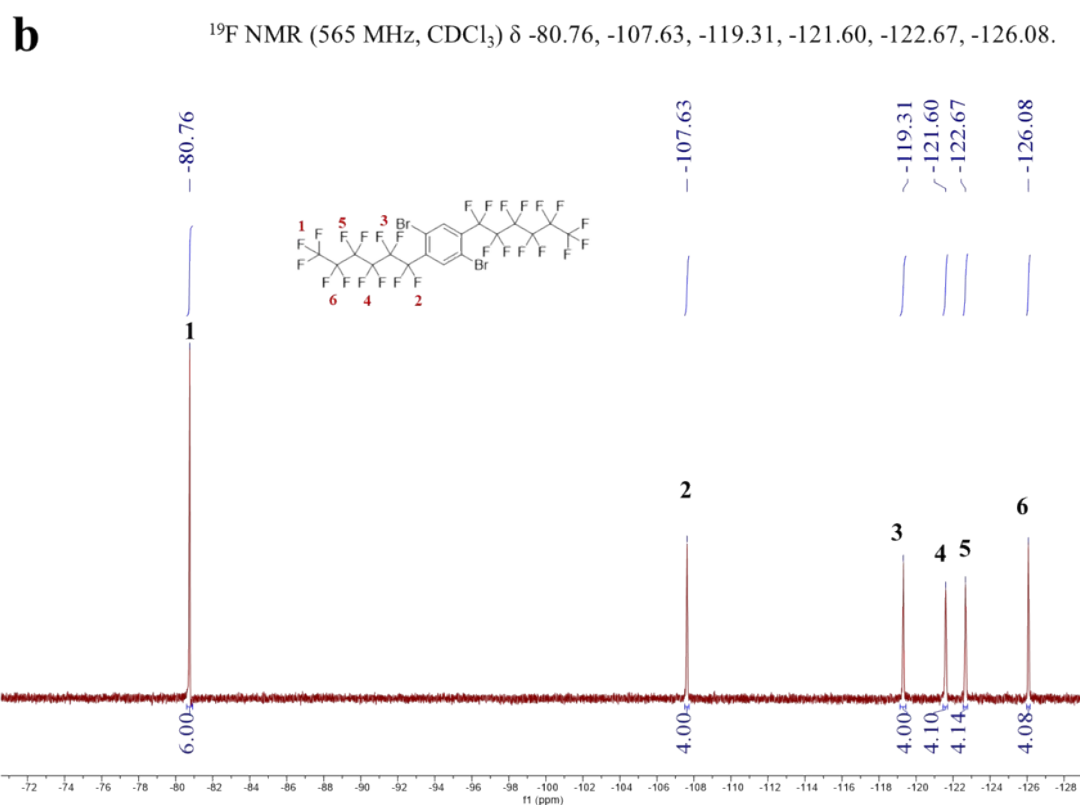

**Fig. S3.** The (a)  $^1\text{H}$ -NMR and (b)  $^{19}\text{F}$ -NMR of **S2**

(a)  $^1\text{H}$ -NMR (600 MHz,  $\text{CDCl}_3$ ):  $\delta$  = 7.94 (s, 2H); (b)  $^{19}\text{F}$ -NMR (565 MHz,  $\text{CDCl}_3$ ): -80.759, -107.628, -119.312, -121.601, -122.673, -126.075.

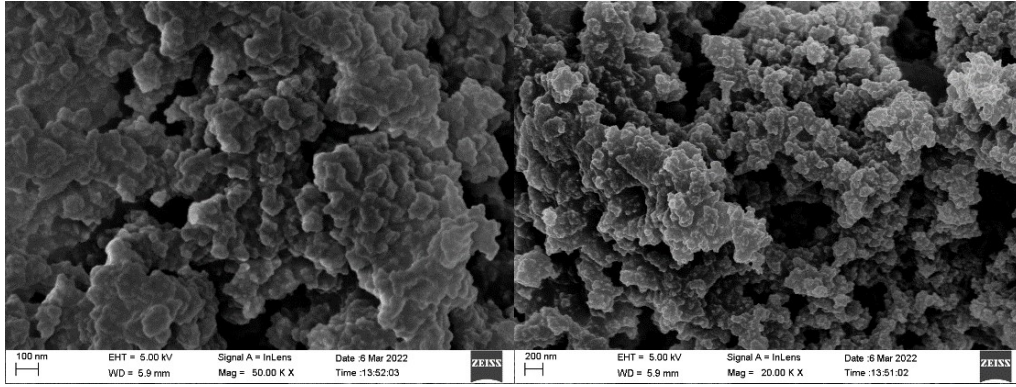

Fig. S4. SEM images of CMP-F6.

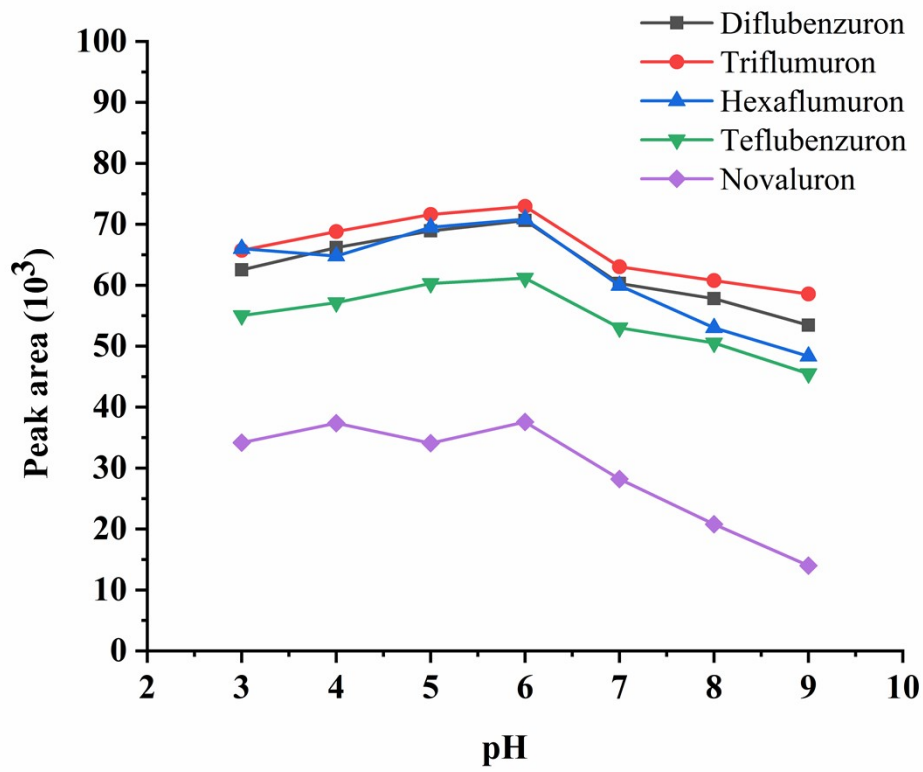

Fig. S5. Effects of pH on extraction efficiency.

**Table S1.** The specific information of the BUs.

| Compounds     | Structural formulas                                                                  | Log P       |
|---------------|--------------------------------------------------------------------------------------|-------------|
| Diflubenzuron | 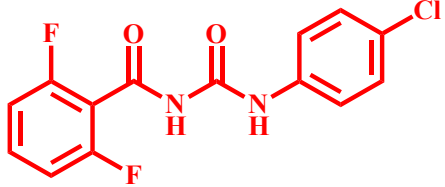   | 3.859±0.416 |
| Triflumuron   |    | 4.647±0.456 |
| Hexaflumuron  |   | 5.673±0.652 |
| Teflubenzuron |  | 5.017±0.579 |
| Novaluron     |  | 6.296±0.787 |

**Table S2.** The RSD values of the CMP-F6 based SBSE-HPLC-UV method.

| Compounds     | Intra-day<br>(%, n=3) | Inter-day<br>(%, n=3) | Between bars<br>(%, n=3) |
|---------------|-----------------------|-----------------------|--------------------------|
| Diflubenzuron | 3.16                  | 2.47                  | 2.21                     |
| Triflumuron   | 1.48                  | 1.56                  | 2.49                     |
| Hexaflumuron  | 5.03                  | 0.03                  | 1.44                     |
| Teflubenzuron | 1.47                  | 0.61                  | 1.80                     |
| Novaluron     | 1.31                  | 2.16                  | 3.18                     |

**Table S3.** Comparison of the CMP-F6@ SSW based SBSE method with other published methods for extraction of BUs.

| Method                       | Sorbent                      | Matrix                   | LOD                | Extraction time | Linear range   | Ref.      |
|------------------------------|------------------------------|--------------------------|--------------------|-----------------|----------------|-----------|
| IS-DLLME-HPLC/UV             | Ionic liquid<br>[N4444][PF6] | Honey                    | 2.10-4.20 ng/g     | about 3 mins    | 2-300 ng/g     | [2]       |
| Dissolvable LDHs-<br>HPLC/UV | Mg/Al LDHs                   | Honey                    | 5-20 ng/g          | <6 min          | 3-2000 ng/g    | [38]      |
| FDME-HPLC/UV                 | 1-dodecanol                  | Peach juice              | 1.52-2.72<br>ng/mL | 35 s            | 10-10000 ng/mL | [12]      |
| SDBS-LDHs-HPLC/UV            | SDBS-LDH                     | Soft drink               | 0.1-0.3 ng/mL      | 25 min          | 0.3-200 ng/mL  | [39]      |
| MSPE-HPLC-UV                 | M-KAP                        | Honey and<br>apple juice | 0.5-1.5 ng/g       | 20 min          | 1.67-1000 ng/g | [40]      |
| SBSE-HPLC-UV                 | CMP-F6                       | Apple juice              | 0.1-0.2 ng/mL      | 120 mins        | 0.5-300 ng/mL  | This work |

IS-DLLME: In-syringe dispersive liquid-liquid microextraction;

LDHs: Layered double hydroxides;

FDME: Floated organic drop microextraction;

MSPE: Magnetic solid phase micro extraction.
